# Supplementary material
Source: publisher figshare collection journal article supplement (https://springernature.figshare.com/ndownloader/files/13772027)
Supplement: Supplementary file [file 13772027]

**Table S1.** Percentages of Type I sites with CB value less or greater than 1.

| Genome type          | Experimental dataset |                  | Control dataset 1  |                    | Control dataset 2 |                   |
|----------------------|----------------------|------------------|--------------------|--------------------|-------------------|-------------------|
|                      | CB < 1               | CB > 1           | CB < 1             | CB > 1             | CB < 1            | CB > 1            |
| dsDNA <sup>1</sup>   | 19454<br>(52.4%)     | 17523<br>(47.2%) | 1123894<br>(51.2%) | 1061083<br>(48.3%) | 259161<br>(52.8%) | 229040<br>(46.7%) |
| ssDNA <sup>1,2</sup> | 880<br>(65.5%)       | 453<br>(33.7%)   | 28202<br>(58.9%)   | 19364<br>(40.5%)   | 109131<br>(62.0%) | 65822<br>(37.4%)  |
| ssRNA <sup>2</sup>   | 166<br>(65.1%)       | 89<br>(34.9%)    | 2595<br>(62.6%)    | 1531<br>(37.0%)    | 554576<br>(55.1%) | 445131<br>(44.2%) |
| dsRNA                | 8<br>(47.1%)         | 9<br>(52.9%)     | 2283<br>(53.9%)    | 1934<br>(45.7%)    | 17811<br>(56.3%)  | 13598<br>(43.0%)  |

<sup>1</sup>The experimental set significantly differs from Control set 1 ( $p$ -value<0.01, Fisher's exact test)

<sup>2</sup>The experimental set significantly differs from Control set 2 ( $p$ -value<0.01, Fisher's exact test)

**Table S2.** Percentages of Type IIM sites with CB value less or greater than 1.

| Genome type        | Experimental dataset |                | Control dataset 1 |                  | Control dataset 2 |                  |
|--------------------|----------------------|----------------|-------------------|------------------|-------------------|------------------|
|                    | CB < 1               | CB > 1         | CB < 1            | CB > 1           | CB < 1            | CB > 1           |
| dsDNA <sup>2</sup> | 517<br>(53.6%)       | 447<br>(46.4%) | 31033<br>(55.5%)  | 24826<br>(44.4%) | 7490<br>(49.1%)   | 7716<br>(50.6%)  |
| ssDNA <sup>2</sup> | 74<br>(70.5%)        | 31<br>(29.5%)  | 1485<br>(57.7%)   | 1083<br>(42.1%)  | 6833<br>(46.4%)   | 7840<br>(53.2%)  |
| ssRNA              | 11<br>(50.0%)        | 10<br>(45.5%)  | 123<br>(49.8%)    | 123<br>(49.8%)   | 19128<br>(51.8%)  | 17674<br>(47.9%) |
| dsRNA              | 1<br>(100.0%)        | 0<br>(0.0%)    | 50<br>(38.5%)     | 80<br>(61.5%)    | 851<br>(51.0%)    | 812<br>(48.6%)   |

**Table S3.** Percentages of Type IIG sites with CB value less or greater than 1.

| Genome type | Experimental dataset |                 | Control dataset 1 |                   | Control dataset 2 |                   |
|-------------|----------------------|-----------------|-------------------|-------------------|-------------------|-------------------|
|             | CB < 1               | CB > 1          | CB < 1            | CB > 1            | CB < 1            | CB > 1            |
| dsDNA       | 2218<br>(50.0%)      | 2210<br>(49.8%) | 532837<br>(50.3%) | 522623<br>(49.4%) | 135717<br>(50.8%) | 130518<br>(48.8%) |
| ssDNA       | 210<br>(54.3%)       | 174<br>(45.0%)  | 20970<br>(53.6%)  | 17920<br>(45.8%)  | 94165<br>(55.8%)  | 73623<br>(43.6%)  |
| ssRNA       | 33<br>(49.3%)        | 33<br>(49.3%)   | 2021<br>(54.0%)   | 1701<br>(45.5%)   | 328254<br>(51.9%) | 300991<br>(47.6%) |
| dsRNA       | 0<br>(0.0%)          | 0<br>(0.0%)     | 1267<br>(51.3%)   | 1195<br>(48.4%)   | 12320<br>(53.3%)  | 10670<br>(46.1%)  |

**Table S4.** Percentages of Type III sites with CB value less or greater than 1.

| Genome type          | Experimental dataset |                 | Control dataset 1 |                   | Control dataset 2 |                   |
|----------------------|----------------------|-----------------|-------------------|-------------------|-------------------|-------------------|
|                      | CB < 1               | CB > 1          | CB < 1            | CB > 1            | CB < 1            | CB > 1            |
| dsDNA <sup>1</sup>   | 3256<br>(51.7%)      | 3039<br>(48.2%) | 240882<br>(49.4%) | 246265<br>(50.5%) | 66544<br>(50.0%)  | 66147<br>(49.7%)  |
| ssDNA <sup>1,2</sup> | 457<br>(63.0%)       | 265<br>(36.6%)  | 11120<br>(51.9%)  | 10232<br>(47.7%)  | 60383<br>(53.4%)  | 52143<br>(46.1%)  |
| ssRNA                | 69<br>(51.5%)        | 65<br>(48.5%)   | 1103<br>(52.0%)   | 1009<br>(47.6%)   | 162116<br>(49.7%) | 163084<br>(50.0%) |
| dsRNA                | 4<br>(66.7%)         | 2<br>(33.3%)    | 599<br>(52.7%)    | 535<br>(47.1%)    | 6769<br>(51.2%)   | 6404<br>(48.4%)   |

**Table S5.** Percentages of Type IV sites with CB value less or greater than 1.

| Genome type          | Experimental dataset |              | Control dataset 1 |                 | Control dataset 2 |                 |
|----------------------|----------------------|--------------|-------------------|-----------------|-------------------|-----------------|
|                      | CB < 1               | CB > 1       | CB < 1            | CB > 1          | CB < 1            | CB > 1          |
| dsDNA <sup>1,2</sup> | 477<br>(91.4%)       | 45<br>(8.6%) | 4316<br>(70.9%)   | 1768<br>(29.1%) | 855<br>(50.4%)    | 839<br>(49.5%)  |
| ssDNA <sup>2</sup>   | 43<br>(84.3%)        | 8<br>(15.7%) | 216<br>(74.0%)    | 76<br>(26.0%)   | 765<br>(44.0%)    | 970<br>(55.7%)  |
| ssRNA                | 5<br>(50.0%)         | 5<br>(50.0%) | 17<br>(60.7%)     | 11<br>(39.3%)   | 2290<br>(54.4%)   | 1911<br>(45.4%) |
| dsRNA                | 0<br>(0.0%)          | 0<br>(0.0%)  | 3<br>(21.4%)      | 11<br>(78.6%)   | 102<br>(52.6%)    | 92<br>(47.4%)   |

**Table S6.** Percentages of asymmetric Type II sites with CB value less or greater than 1.

| Genome type          | Experimental dataset |                 | Control dataset 1 |                   | Control dataset 2 |                   |
|----------------------|----------------------|-----------------|-------------------|-------------------|-------------------|-------------------|
|                      | CB < 1               | CB > 1          | CB < 1            | CB > 1            | CB < 1            | CB > 1            |
| dsDNA <sup>1,2</sup> | 3871<br>(57.5%)      | 2860<br>(42.4%) | 224639<br>(51.6%) | 209729<br>(48.2%) | 58067<br>(50.5%)  | 56533<br>(49.2%)  |
| ssDNA <sup>1</sup>   | 288<br>(60.4%)       | 185<br>(38.8%)  | 9490<br>(54.5%)   | 7841<br>(45.0%)   | 48212<br>(55.4%)  | 38396<br>(44.1%)  |
| ssRNA                | 46<br>(50.5%)        | 43<br>(47.3%)   | 908<br>(53.2%)    | 789<br>(46.2%)    | 145262<br>(52.6%) | 129583<br>(46.9%) |
| dsRNA                | 1<br>(50.0%)         | 1<br>(50.0%)    | 509<br>(50.7%)    | 491<br>(48.9%)    | 5616<br>(52.8%)   | 4979<br>(46.8%)   |
